# Supplementary material for: Boosting light harvesting and charge separation of WO3via coupling with Cu2O/CuO towards highly efficient tandem photoanodes
Source: Royal Society of Chemistry journal article supplement (doi:10.1039/d1ra00417d), 2021-01-01
Supplement: d1ra00417d1.pdf [file d1ra00417d1.pdf]

## Supplementary Information

### **Boosting Light Harvesting and Charge Separation of WO<sub>3</sub> Via Coupling with Cu<sub>2</sub>O/CuO Towards Highly Efficient Tandem Photoanode**

Mahmoud A. Khalifa<sup>1,2</sup>, Luying Shen<sup>1</sup>, Jianming Zheng<sup>1</sup>, and Chunye Xu<sup>1,\*</sup>

<sup>1</sup> Hefei National Laboratory for Physical Sciences at the Microscale, CAS Key Laboratory of Soft Matter Chemistry, Department of Polymer Science and Engineering, University of Science and Technology of China, Hefei 230026, P. R. China.

<sup>2</sup> Physics Department, Faculty of Science, Mansoura University, Mansoura 35516, Egypt.

\*Corresponding Author E-mail Address [ [chunye@ustc.edu.cn](mailto:chunye@ustc.edu.cn) ]

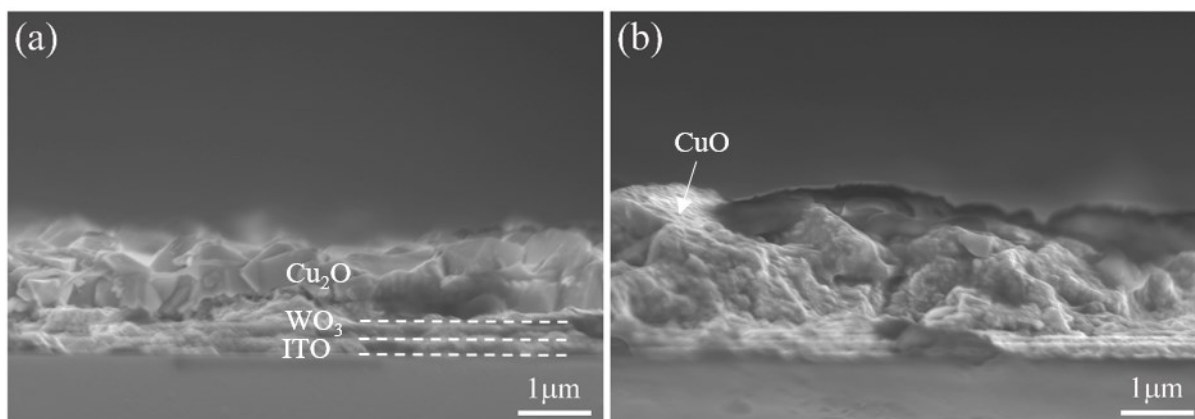

**Fig. S1** Cross-section SEM images of the as-prepared ITO/WO<sub>3</sub>/Cu<sub>2</sub>O photoanode (a) before and (b) after annealing at 300 °C in the open air. The scale bar is 1 μm.

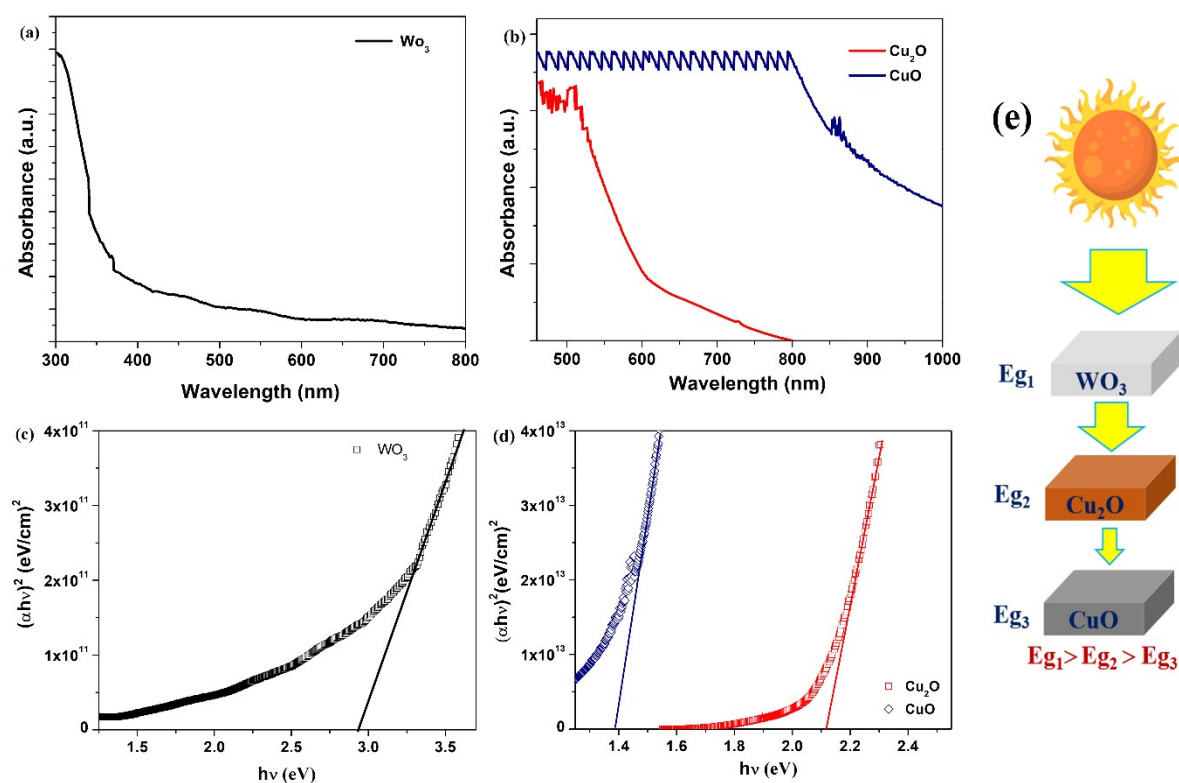

**Fig. S2** The optical absorption spectra of (a) WO<sub>3</sub> and (b) Cu<sub>2</sub>O and CuO thin films. Tauc plots of (c) WO<sub>3</sub> and (d) Cu<sub>2</sub>O and CuO thin films. (e) Schematic diagram of the WO<sub>3</sub>/Cu<sub>2</sub>O/CuO tandem design. The WO<sub>3</sub> thin film was grown on an ITO by the hydrothermal method. The Cu<sub>2</sub>O thin film was deposited by the electrodeposition method. The CuO thin film was prepared by the annealing of Cu<sub>2</sub>O at 550 °C for 1hr on muffle furnace.

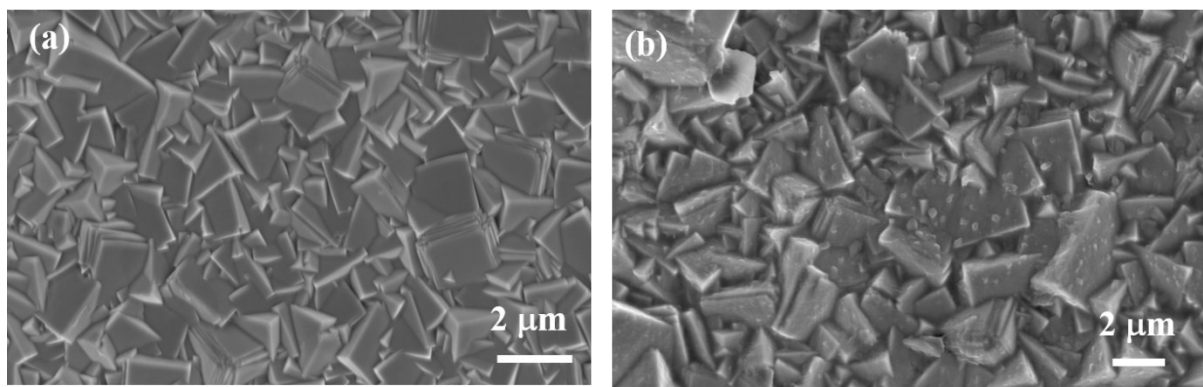

**Fig. S3** SEM images of ITO/WO<sub>3</sub>/Cu<sub>2</sub>O photoanode at 15 min (a) before and (b) after the PEC test. The scale bar is 2μm.
